# Supplementary material
Source: Springer Nature journal article supplement (https://www.springermedizin.de/resource/supplementary/12967_2010_770_MOESM1_ESM.pdf/9577004)

# Figures

Figure 1

## Histomorphologic aspect of BRONJ

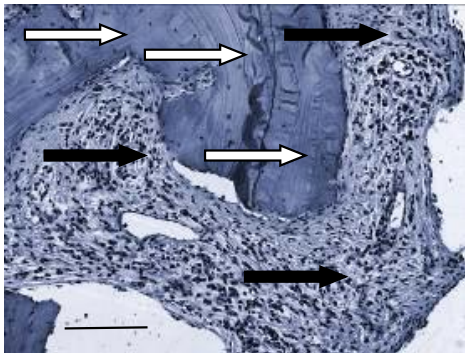

Supplement: MOESM1 [file 9577004]
